# Supplementary material
Source: PubMed Central journal article supplement (PMC2887559)
Supplement: supp_59_1_8__1.pdf [file supp_59_1_8__1.pdf]

**Supplementary Table S1.** Intracellular growth of wild-type and mutants in RAW 246.7 macrophages

| Strain              | No. of c.f.u. (ml macrophage lysate) <sup>-1*</sup> |                           |
|---------------------|-----------------------------------------------------|---------------------------|
|                     | 1 h                                                 | 4 days                    |
| Wild-type (MAC 104) | 1.6±0.4×10 <sup>5</sup>                             | 5.2±0.5×10 <sup>5</sup>   |
| STM1                | 1.7±0.3×10 <sup>5</sup>                             | 8.3±0.3×10 <sup>4</sup> † |
| STM2                | 3.2±0.4×10 <sup>5</sup>                             | 7.0±0.4×10 <sup>4</sup> † |
| STM3                | 5.0±0.7×10 <sup>5</sup>                             | 1.6±0.5×10 <sup>5</sup>   |
| STM4                | 2.3±0.3×10 <sup>5</sup>                             | 1.9±0.6×10 <sup>5</sup>   |
| STM5                | 3.8±0.5×10 <sup>5</sup>                             | 2.6±0.4×10 <sup>4</sup> † |
| STM6                | 2.1±0.7×10 <sup>5</sup>                             | 7.4±0.5×10 <sup>4</sup> † |
| STM8                | 4.7±0.3×10 <sup>5</sup>                             | 6.1±0.5×10 <sup>4</sup> † |
| STM10               | 2.5±0.6×10 <sup>5</sup>                             | 1.1±0.3×10 <sup>4</sup> † |
| STM11               | 3.0±0.3×10 <sup>5</sup>                             | 2.4±0.6×10 <sup>3</sup> † |

\*Macrophage monolayers were infected for 1 h, washed and intracellular bacteria allowed to grow for 4 days.

Monolayers were lysed and processed as described in Methods. The experiment was repeated three times.

†*P*<0.05 compared with control (wild-type MAC 104) at 4 days after infection.

**Supplementary Table S2.** Susceptibility of wild-type *M. avium* and STM mutants to exposure to NO *in vitro*

| Strain              | No. of c.f.u.       |                         |                           |                           |
|---------------------|---------------------|-------------------------|---------------------------|---------------------------|
|                     | Inoculum            | NOR-3 concentration*    |                           |                           |
|                     |                     | 0 μM                    | 0.1 μM                    | 1 μM                      |
| Wild-type (MAC 104) | 1×10 <sup>5</sup>   | 9.8±0.3×10 <sup>4</sup> | 9.3±0.4×10 <sup>4</sup>   | 9.1±0.3×10 <sup>4</sup>   |
| STM1                | 1.5×10 <sup>5</sup> | 9.9±0.3×10 <sup>4</sup> | 8.3±0.3×10 <sup>4</sup>   | 8.2±0.2×10 <sup>4</sup>   |
| STM5                | 1.9×10 <sup>5</sup> | 9.8±0.6×10 <sup>4</sup> | 7.8±0.5×10 <sup>4</sup>   | 5.6±0.3×10 <sup>4</sup> † |
| STM10               | 1.2×10 <sup>5</sup> | 9.6±0.4×10 <sup>4</sup> | 6.1±0.2×10 <sup>4</sup> † | 5.8±0.4×10 <sup>3</sup> † |
| STM11               | 1.4×10 <sup>5</sup> | 9.7±0.6×10 <sup>4</sup> | 9.3±0.4×10 <sup>4</sup>   | 3.5±0.3×10 <sup>4</sup> † |

\*Bacteria were incubated with NOR-3, pH 7.4, at 37 °C for 60 min. Viability was then determined by plating.

†*P*<0.01 compared to the control WT MAC 104.

---

Li, Y., Danelishvili, L., Wagner, D., Petrofsky, M. & Bermudez, L. E. (2010). Identification of virulence determinants of *Mycobacterium avium* that impact on the ability to resist host killing mechanisms. *Journal Med Microbiol* **59**, 8–16.

---
